# Supplementary material
Source: PubMed Central journal article supplement (PMC9028909)
Supplement: 12039_2022_2046_MOESM1_ESM.pdf [file 12039_2022_2046_MOESM1_ESM.pdf]

## SUPPLEMENTARY INFORMATION

### **Applying Polypharmacology Approach for Drug Repurposing for SARS-CoV2**

ESTHER JAMIR<sup>1,2</sup>, HIMAKSHI SARMA<sup>1</sup>, LIPSA PRIYADARSINEE<sup>1,2</sup>, SELVARAMAN NAGAMANI<sup>1,2</sup>, KIKRUSENUO KIEWHUO<sup>1,2</sup>, ANAMIKA SINGH GAUR<sup>1,2</sup>, RAVINDRA K RAWAL<sup>1,2</sup>, NATARAJAN ARUL MURUGAN<sup>3</sup>, VENKATESAN SUBRAMANIAN<sup>2,4</sup> and G NARAHARISASTRY\*<sup>1,2</sup>

<sup>1</sup>Advanced Computation and Data Sciences Division, CSIR – North East Institute of Science and Technology, Jorhat 785006, Assam, India

<sup>2</sup>Academy of Scientific and Innovative Research (AcSIR), Ghaziabad, India

<sup>3</sup>Department of Computer Science, School of Electrical Engineering and Computer Science, KTH Royal Institute of Technology, S-106 91, Stockholm, Sweden

<sup>4</sup>Center for High Computing, CSIR- Central Leather Research Institute (CLRI)

\*Email: [gnsastry@gmail.com](mailto:gnsastry@gmail.com); [gnsastry@neist.res.in](mailto:gnsastry@neist.res.in)

**Table S1.** List of SARS-CoV-2 protein targets considered in the present study along with their binding site residues.

| S. No. | Target proteins                                        | Resolution | Residue length | Binding site residues                                                                                                                                         |
|--------|--------------------------------------------------------|------------|----------------|---------------------------------------------------------------------------------------------------------------------------------------------------------------|
| 1.     | 3C-like proteinase (3CL <sup>pro</sup> )<br>PDB: 6M03  | 2 Å        | 306            | <b>His41</b> , Met49, Asn142, <b>Cys145</b> , His163, His164, Met165, Glu166, Arg188, Gln189                                                                  |
| 2.     | Papain-like protease (PL <sup>pro</sup> )<br>PDB: 6W9C | 2.7 Å      | 311            | <b>Cys111</b> , Leu162, Gly163, Asp164, Arg166, Met208, Tyr268, <b>His272</b> , Tyr273, <b>Asp286</b> , Thr301                                                |
| 3.     | RNA-directed RNA polymerase (RdRp, NSP12)*             | -          | 888            | Lys545, Arg553, Arg555, Asp618, <b>Ser759</b> , <b>Asp760</b> , <b>Asp761</b>                                                                                 |
| 4.     | Helicase (NSP13) *                                     | -          | 596            | <b>Lys288</b> , Ser289, Asp374, Glu375, Gln404, Arg567                                                                                                        |
| 5.     | Exoribonuclease (NSP14)*                               | -          | 525            | <b>Asp243</b> , <b>Asp273</b> , Ile332, Phe367, Val389, <b>Asp331</b> , Gly333, <b>Trp292</b> , Phe401, Tyr420, <b>Phe426</b> , Thr428, Phe506, <b>Lys336</b> |
| 6.     | Endoribonuclease (NSP15)<br>PDB: 6W01                  | 1.9 Å      | 370            | <b>His235</b> , <b>His250</b> , Asp273, Ser274, <b>Lys290</b> , <b>Thr341</b> , <b>Tyr343</b> , <b>Ser294</b>                                                 |
| 7.     | 2'-O methyltransferase (NSP16)<br>PDB: 6W4H            | 1.8 Å      | 301            | <b>Met6839</b> , Met6840, Asp6879, Asp6897, Leu6898, <b>Asp6928</b> , Met6929, Tyr6930, <b>Lys6968</b> , Ser6999, <b>Ser7000</b> , <b>Glu7001</b>             |

\*Modelled and obtained from SARS-CoV-2; <https://swissmodel.expasy.org/repository/species/2697049>  
The amino acids depicted in boldface are catalytic residues.

**Table S2.** Grid box coordinates and size parameters used in AutoDockVina.

|                    |   | <b>3CL<sup>pro</sup></b> | <b>PL<sup>pro</sup></b> | <b>NSP12</b> | <b>NSP13</b> | <b>NSP14</b> | <b>NSP15</b> | <b>NSP16</b> |
|--------------------|---|--------------------------|-------------------------|--------------|--------------|--------------|--------------|--------------|
| Center<br>(Å)      | x | -13.66                   | -28.08                  | 120.30       | 416.04       | -9.30        | -9.30        | 84.67        |
|                    | y | -18.24                   | 28.753                  | 115.69       | -17.79       | -40.99       | -40.99       | 20.83        |
|                    | z | 22.77                    | 30.30                   | 128.41       | 74.82        | -12.82       | -12.82       | 25.63        |
| Box<br>Size<br>(Å) | x | 30                       | 30                      | 50           | 34           | 32           | 34           | 34           |
|                    | y | 38                       | 40                      | 48           | 30           | 32           | 34           | 30           |
|                    | z | 30                       | 28                      | 44           | 34           | 36           | 34           | 32           |

**Table S3.** Prioritization of identified 25 polypharmacological hits through physiochemical properties.

| S.No. | Filter (total compounds passed) | Descriptor name | Descriptor cut-off | Compounds passed | Compounds violated |
|-------|---------------------------------|-----------------|--------------------|------------------|--------------------|
| 1.    | Lipinski                        | Mol.Wt          | $\leq 500$         | 6                | 19                 |
|       |                                 | AlogP           | $\leq 5$           | 25               | 0                  |
|       |                                 | HBD             | $\leq 5$           | 20               | 5                  |
|       |                                 | HBA             | $\leq 10$          | 3                | 22                 |
| 2.    | Veber                           | nRB             | $\leq 10$          | 21               | 4                  |
|       |                                 | PSA             | $\leq 140$         | 12               | 13                 |
| 3.    | MDDR                            | nRing           | $\geq 3$           | 25               | 0                  |
|       |                                 | nRig            | $\geq 18$          | 25               | 0                  |
|       |                                 | nRB             | $\geq 6$           | 20               | 5                  |

Mol.Wt: Molecular weight, AlogP: Partition coefficient, HBD: H-bond donor count, HBA: H-bond acceptor count, nRB: Number of rotatable bonds, nRing: Number of rings, nRig: Number rigid bonds, PSA: Polar surface area.

**Table S4.** Predicted pharmacokinetic parameters of 25 selected drugs.

| S. No. | Drugs                           | LogS   | LogD   | LogP  | Pgp   | HIA   | Caco-2 | PPB (%) | VD     | CL    | T <sub>1/2</sub> | MW      | TPSA   |
|--------|---------------------------------|--------|--------|-------|-------|-------|--------|---------|--------|-------|------------------|---------|--------|
| 1.     | Acetyldigitoxin                 | -4.69  | 3.72   | 4.50  | 1.00  | 0.01  | -5.57  | 92.83   | 0.37   | 1.94  | 0.11             | 806.45  | 195.97 |
| 2.     | Antrafenine                     | -6.19  | 5.01   | 6.49  | 0.00  | 0.00  | -5.93  | 98.51   | 6.01   | 4.07  | 0.00             | 588.20  | 60.93  |
| 3.     | Bisdequalinium chloride         | -7.13  | 4.66   | 10.42 | 1.00  | 0.97  | -5.72  | 100.46  | 5.03   | 4.72  | 0.03             | 665.80  | 31.82  |
| 4.     | Conivaptan                      | -6.44  | 3.81   | 5.13  | 0.57  | 0.01  | -5.20  | 99.99   | 0.51   | 2.81  | 0.07             | 498.21  | 78.09  |
| 5.     | Digitoxin                       | -4.61  | 3.80   | 4.10  | 1.00  | 0.02  | -5.73  | 94.28   | 0.36   | 3.82  | 0.14             | 764.43  | 189.90 |
| 6.     | Dihydroergocristine             | -4.17  | 3.45   | 4.38  | 0.65  | 0.02  | -5.15  | 93.31   | 3.10   | 14.68 | 0.73             | 611.31  | 118.21 |
| 7.     | Dihydroergotamine               | -3.19  | 2.72   | 3.71  | 0.08  | 0.01  | -5.09  | 91.05   | 2.92   | 14.60 | 0.72             | 583.28  | 118.21 |
| 8.     | Eltrombopag                     | -3.59  | 2.42   | 5.56  | 0.00  | 0.01  | -4.78  | 101.10  | 0.15   | 0.60  | 0.56             | 442.16  | 120.04 |
| 9.     | Entrectinib                     | -5.74  | 3.83   | 4.87  | 1.00  | 0.23  | -5.60  | 96.40   | 2.56   | 4.15  | 0.06             | 560.27  | 88.75  |
| 10.    | Ergotamine                      | -2.88  | 2.60   | 3.35  | 0.02  | 0.01  | -5.03  | 88.91   | 3.21   | 14.97 | 0.57             | 581.26  | 118.21 |
| 11.    | Glycyrrhizic acid               | -4.01  | 2.14   | 2.59  | 0.18  | 0.96  | -6.57  | 75.11   | 0.36   | 0.83  | 0.77             | 822.40  | 267.04 |
| 12.    | Ledipasvir                      | -4.15  | 5.49   | 7.75  | 0.99  | 0.05  | -5.66  | 99.51   | 1.54   | 4.30  | 0.01             | 888.41  | 174.64 |
| 13.    | Paritaprevir                    | -4.86  | 2.12   | 3.98  | 0.96  | 0.01  | -5.15  | 97.63   | 1.34   | 2.56  | 0.22             | 765.29  | 189.65 |
| 14.    | Quinupristin                    | -4.51  | 2.39   | 3.53  | 1.00  | 0.91  | -5.95  | 76.73   | 0.56   | 5.43  | 0.24             | 1021.47 | 231.20 |
| 15.    | Teicoplaninaglycone             | -7.46  | 1.82   | 5.36  | 0.93  | 0.90  | -6.48  | 95.93   | 0.42   | -0.08 | 0.36             | 1197.22 | 424.22 |
| 16.    | Temoporfin                      | -3.14  | 3.29   | 6.78  | 0.01  | 0.03  | -6.08  | 98.93   | 1.91   | 6.36  | 0.08             | 680.24  | 144.08 |
| 17.    | Tirilazad                       | -5.55  | 4.85   | 7.09  | 0.02  | 0.01  | -4.93  | 98.36   | 1.47   | 7.16  | 0.01             | 624.42  | 72.88  |
| 18.    | Ubrogepant                      | -5.75  | 3.34   | 3.64  | 0.62  | 0.00  | -5.13  | 95.35   | 0.90   | 1.78  | 0.03             | 549.20  | 105.45 |
| 19.    | Venetoclax                      | -5.95  | 4.30   | 7.20  | 0.98  | 0.00  | -5.46  | 101.00  | 1.04   | 1.59  | 0.01             | 867.32  | 172.03 |
| 20.    | Zinostatin                      | -3.52  | 2.53   | 4.11  | 0.92  | 0.24  | -5.83  | 95.55   | 1.05   | 4.15  | 0.13             | 661.22  | 174.77 |
| 21.    | Guamecycline                    | -1.423 | -0.981 | -0.91 | 1.00  | 0.615 | -6.734 | 48.67   | 1.324  | 1.378 | 0.039            | 626.28  | 256.04 |
| 22.    | Anazolene                       | 0.071  | 1.498  | 0.508 | 0.029 | 0.971 | -6.276 | 100.18  | 0.343  | 1.302 | 0.047            | 629.02  | 220.09 |
| 23.    | Deslanoside                     | -4.264 | 2.242  | 1.979 | 1.00  | 0.811 | -6.333 | 63.23   | -0.077 | 0.256 | 0.599            | 942.48  | 289.28 |
| 24.    | Dexamethasone metasulfobenzoate | -2.712 | 1.82   | 2.523 | 0.024 | 0.517 | -5.669 | 85.86   | 0.46   | 2.98  | 0.652            | 576.18  | 155.27 |
| 25.    | Lumacaftor                      | -4.175 | 4.399  | 5.518 | 0.024 | 0.003 | -4.933 | 98.77   | 0.247  | 1.59  | 0.332            | 452.12  | 100.98 |

Pgp; probability of Pgp substrate, HIA; human intestinal absorption, Caco-2; human colon adenocarcinoma cell permeability, PPB; plasma protein binding, VD; volume of distribution, CL; clearance, T<sub>1/2</sub>; half-life, MW; molecular weight, TPSA; total polar surface area.

**Table S5.** Ramachandran plot and ERRAT results for NSP12, NSP13 and NSP14 protein structure

| <b>RC plot regions % of residues</b> | <b>NSP12</b> | <b>NSP13</b> | <b>NSP14</b> |
|--------------------------------------|--------------|--------------|--------------|
| Favoured region                      | 91.6%        | 89.6%        | 86.0%        |
| Allowed region                       | 7.7%         | 9.8%         | 11.6%        |
| Outlier region                       | 0.7%         | 0.2%         | 1.7%         |
| ERRAT                                | 92%          | 94%          | 90%          |

**Table S6.** The Venetoclax interactions with 3CL<sup>pro</sup>, PL<sup>pro</sup>, NSP12, NSP13, NSP14 and NSP16 obtained at 10 ns intervals from 100MD simulation trajectories. The brackets beside the amino acid depicted the number of interactions that particular residue has formed.

| Proteins           | Types of bonds         | Pre-MD Simulation              | Post MD Simulation              |               |                      |                  |                   |              |                     |                         |              |                     |
|--------------------|------------------------|--------------------------------|---------------------------------|---------------|----------------------|------------------|-------------------|--------------|---------------------|-------------------------|--------------|---------------------|
|                    |                        |                                | 10 ns                           | 20 ns         | 30 ns                | 40 ns            | 50 ns             | 60 ns        | 70 ns               | 80 ns                   | 90 ns        | 100 ns              |
| 3CL <sup>pro</sup> | H-Bond                 | Thr24                          | Asn142                          | Thr24         | Asn119               | -                | Asn119            | -            | -                   | -                       | -            | -                   |
|                    | $\pi$ - $\sigma$ Bond  | Thr25                          | -                               | -             | -                    | -                | -                 | -            | -                   | -                       | -            | -                   |
|                    | C-H Bond               | Ser46                          | Thr26, Gly143, Thr25, Glu26 (2) | Thr24, Thr26  | Gly143, Cys44, Thr45 | -                | Thr24             | -            | -                   | -                       | -            | -                   |
|                    | $\pi$ -Alkyl           | Met49, Leu67                   | His41 (2), Met49                | -             | His41                | -                | His41             | -            | -                   | -                       | -            | -                   |
|                    | Alkyl                  | Met165                         | Met49 (2), Met165 (2)           | Met49, Met165 | Met49, Met165 (2)    | -                | Met49 (2), Met165 | -            | -                   | -                       | -            | -                   |
|                    | $\pi$ -Sulphur         |                                | -                               | -             | Met49                | -                | -                 | -            | -                   | -                       | -            | -                   |
|                    | Amide- $\pi$           |                                | -                               | -             | Thr45                | -                | -                 | -            | -                   | -                       | -            | -                   |
| PL <sup>pro</sup>  | H-Bond                 | Glu167, Asn267, Tyr273, Thr301 | -                               | -             | Leu16, Asn13         | Thr18            | -                 | -            |                     | His50                   | -            | His50               |
|                    | $\pi$ - $\pi$ T-Shaped | Tyr264                         | -                               | -             | Phe8                 | -                | -                 | -            | His47               | -                       | His50        | -                   |
|                    | $\pi$ -Alkyl           | Pro248                         | Leu162                          | -             | Ile14, Leu16         | -                | -                 | Val41, His50 | Val41, His50, Leu36 | His50, Leu36, Val41     | Leu36        | His50, Leu36, Val41 |
|                    | Alkyl                  | Leu162                         | Leu162                          | -             | -                    | Leu162, Val20    | Lys6 (2)          | Val41, Ile44 | Ala39, Ile44, Val41 | Ala39 (2), Ile44, Val41 | Ala39, Leu36 | Ala39, Val41        |
|                    | C-H                    | Asp164                         | -                               | -             | Asn15, His17         | Asn15, His17 (2) | -                 | Ser49        | Ser49               | Lys53                   | -            | Ser49               |
|                    | Aminde- $\pi$ Stacked  | -                              | Leu162 (2)                      | -             | -                    | -                | -                 | His50        | -                   | -                       | -            | -                   |

|       |                        |                                |                            |                                    |                                |                            |                                |                             |                                |                                |                        |                                    |
|-------|------------------------|--------------------------------|----------------------------|------------------------------------|--------------------------------|----------------------------|--------------------------------|-----------------------------|--------------------------------|--------------------------------|------------------------|------------------------------------|
|       | $\pi$ -Sigma           | -                              | -                          | -                                  | Leu16                          | -                          | His17                          | -                           | -                              | -                              | -                      | -                                  |
|       | $\pi$ - $\pi$ Stacked  | -                              | -                          | -                                  | -                              | -                          | Phe8                           | -                           | His50                          | -                              | His47                  | -                                  |
|       | Halogen                | -                              | -                          | -                                  | -                              | -                          | -                              | -                           | -                              | -                              | Ser49                  | -                                  |
| NSP12 | H-Bonds                | Glu811, Asp761, Asp618         | Lys798 (2), Lys438, Asp618 | -                                  | -                              | -                          | -                              | -                           | -                              | Glu811                         | Lys438, Glu811, His810 | -                                  |
|       | Alkyl                  | Cys813, Ala797                 | Lys438                     | -                                  | -                              | Ala797                     | -                              | -                           | -                              | Ala797                         | -                      | -                                  |
|       | $\pi$ -Alkyl           | His810, Lys798, Cys813         | Trp800 (4), Ala550         | Lys438                             | His810(2), Ala797(3)           | Trp800, Ala797, His810 (2) | Trp800 (2), Ala797             | Trp800, Ala 797, His 810(3) | Trp800, Ala 797(2), His 810(2) | His810(2), His816              | His810                 | His810                             |
|       | $\pi$ - $\pi$ T-Shaped | -                              | His810                     | -                                  | His 810                        | His 810                    | -                              | -                           | -                              | -                              | -                      | His810(2)                          |
|       | C-H Bond               | Asp618, c, His810              | His439, Lys438, Ala550     | -                                  | Lys 160, Ala 797               | Ala 797, Cys 799, Ala 797  | Lys789, Cys799(2), Glu 796 (2) | Lys799 (2), Glu796          | Ala797                         | His810, His816, Cys799, Glu811 | His810, His816, Ala797 | Lys798                             |
|       | $\pi$ -Anion           | Glu811                         | -                          | -                                  | -                              | -                          | -                              | -                           | -                              | -                              | -                      | -                                  |
|       | Halogen                | Glu802                         | -                          | Asp618                             | Asp618                         | Asp618                     | Asp618                         | Asp618                      | Asp618                         | Asp618                         | Asp618                 | Asp618                             |
|       | $\pi$ -Cation          | -                              | -                          | Lys438                             | -                              | -                          | -                              | -                           | -                              | -                              | -                      | -                                  |
|       | Aminde- $\Pi$ Stacked  | -                              | -                          | -                                  | -                              | -                          | Glu796, Ala797                 | Glu796, Ala797              | -                              | -                              | -                      | -                                  |
|       | H-Bonds                | Asn516, Arg212, Asn177, Arg178 | Met378                     | -                                  | -                              | Ser535, Met378             | -                              | Gln537                      | Gln537                         | Ser310                         | Arg567, Asn179         | -                                  |
|       | C-H Bonds              | Lys146                         | Arg178, Gly538             | Ser310, Ser535 (2), Asp383, Asp534 | Lys146, Ser310, Ser535, Asp534 | Ser310, Ser535 (2)         | Ser310                         | Ser310, Ser535, Asn179      | Ser310, Ser535                 | Ser310                         | Lys146, Gly538         | Gly538, Asn179, Pro284 (2), Thr286 |



|       |                        |                        |                                   |                                      |                                               |                                    |                                |                                     |                                            |                                                       |                            |                   |                |
|-------|------------------------|------------------------|-----------------------------------|--------------------------------------|-----------------------------------------------|------------------------------------|--------------------------------|-------------------------------------|--------------------------------------------|-------------------------------------------------------|----------------------------|-------------------|----------------|
| NSP13 | Alkyl                  | Arg409, Ala407, Pro408 | Arg178, Cys309, Pro408            | Pro408                               | Pro408 (2)                                    | Pro408 (2)                         | Pro408                         | Pro408                              | Pro408                                     | Pro408                                                | Ala312, Pro408             | Pro408 (2)        | Pro408, Lys288 |
|       | $\pi$ -Alkyl           | Tyr180, Pro408, Arg178 | Tyr180, Pro408(2), Cys309, Ala407 | Tyr180, Pro408 (2), Cys 309, Ala 407 | Tyr180 (2), Ala407, Pro408(2), Cys309, Met378 | Tyr180 (2), Pro408, Cys309, Ala407 | Tyr180 (2), Ala 407, Pro408(2) | Tyr180, Pro408(2), Cys 309, Ala 407 | Tyr180 (2), Ala 407 (2), Pro408(2), Met378 | Tyr180, Pro408(2), Cys309, Ala407 (2), Met378, Ala312 | Tyr180, Pro408(2), Met 378 | Tyr180, Pro408(2) |                |
|       | $\pi$ -Anion           | Asp534                 | -                                 | -                                    | -                                             | -                                  | -                              | -                                   | -                                          | -                                                     | -                          | -                 | -              |
|       | $\pi$ -Sigma           | -                      | Met378                            | -                                    | -                                             | Met378                             | Met 378                        | -                                   | -                                          | -                                                     | -                          | -                 | -              |
|       | Halogen                | -                      | Glu143                            | Glu143                               | Glu143                                        | Glu143                             | Glu143                         | Glu143                              | Glu143                                     | Glu143                                                | Glu143                     | Glu 143           | Glu 143        |
|       | $\pi$ -Sulphur         | -                      | Met378                            | Met378 (2)                           | Met378                                        | -                                  | Met378, Cys309                 | Met378                              | -                                          | Met378                                                | Met378                     | Met378            | Met378         |
|       | $\pi$ - $\pi$ T-Shaped | .-                     | -                                 | -                                    | -                                             | Tyr180                             | -                              | -                                   | -                                          | -                                                     | -                          | -                 | -              |
|       | Aminde- $\pi$ Stacked  | -                      | -                                 | -                                    | -                                             | -                                  | -                              | Gln537, Gly538                      | -                                          | -                                                     | -                          | -                 | -              |
|       | $\pi$ - $\pi$ Stacked  | -                      | -                                 | -                                    | -                                             | -                                  | -                              | -                                   | -                                          | Tyr180                                                | -                          | -                 | -              |
|       | $\pi$ -Donor           | -                      | -                                 | -                                    | -                                             | -                                  | -                              | -                                   | -                                          | -                                                     | -                          | -                 | Gln537 (2)     |
| NSP14 | H-Bond                 | Arg289, Ala353         | Gln262                            | -                                    | -                                             | -                                  | -                              | -                                   | -                                          | -                                                     | -                          | -                 | -              |
|       | $\pi$ -Cation          | Arg289                 | -                                 | -                                    | -                                             | -                                  | -                              | -                                   | -                                          | -                                                     | -                          | -                 | -              |
|       | $\pi$ -Sulfur          | Cys387                 | Tyr260                            | -                                    | -                                             | -                                  | -                              | -                                   | -                                          | -                                                     | -                          | -                 | -              |
|       | $\pi$ -Sigma           | Ala353, Val290         | -                                 | -                                    | -                                             | -                                  | --                             | -                                   | -                                          | -                                                     | -                          | -                 | -              |

|       |                        |                                                |                                        |                                |   |             |             |                           |                                |                   |                                |   |
|-------|------------------------|------------------------------------------------|----------------------------------------|--------------------------------|---|-------------|-------------|---------------------------|--------------------------------|-------------------|--------------------------------|---|
|       | $\pi$ - $\pi$ Stacked  | Phe426, Phe367                                 | -                                      | -                              | - | -           | -           | -                         | -                              | -                 | -                              | - |
|       | $\pi$ - Donor Hydrogen | Asn386                                         | -                                      | -                              | - | -           | -           | -                         | -                              | -                 | -                              | - |
|       | Alkyl                  | Pro335                                         | Val290 (2)                             | Lys423                         | - | -           | -           | -                         | -                              | -                 | -                              | - |
|       | $\pi$ -Alkyl           | Trp292, phe426, phe506, Tyr420, Val389, Cys387 | His427, Lys288 (2), Leu259             | His242, Phe426, His427, Pro492 | - | -           | -           | -                         | -                              | -                 | -                              | - |
|       | C-H Bonds              | -                                              | Tyr260, His283, Lys288, His427, Cys414 | His242 (2)                     | - | -           | -           | -                         | -                              | -                 | -                              | - |
|       | Halogen                | -                                              | Glu 84                                 | -                              | - | -           | -           | -                         | -                              | -                 | -                              | - |
| NSP16 | H-Bonds                | Tyr6930, Asp6873, Lys6844, Asn6996             | Lys6844, Lys6968 (2)                   | -                              | - | His6972     | -           | Tyr6930, His6972, Thr6934 | His6972, Asn6936               | Lys6939, His6972  | Asn6936                        | - |
|       | $\pi$ - $\pi$ T-Shaped | Tyr6930                                        | -                                      | -                              | - | -           | -           | -                         | -                              | -                 | -                              | - |
|       | Alkyl                  | Met6929, Leu6898, Lys6935, Cys6913             | Leu6898                                | -                              | - | Leu6898 (2) | Val6937     | Val6937                   | Val6937                        | -                 | Val6937, Pro6932               | - |
|       | $\pi$ -Alkyl           | Phe6868, Leu6898, Phe6947, Cys6913             | Pro6932 (2), Leu6898, Met6929          | -                              | - | Pro6932     | Pro6932 (2) | Pro6932 (3), Lys6933      | Leu6898, Pro6932               | Val6937, Pro6932  | Pro6932                        | - |
|       | C-H Bond               | Asp6897, Asp6928, Pro6932                      | Tyr693, Asp6897                        | -                              | - | His6972 (2) | Lys6935     | Ser6872 (2), Asn6936      | His69729 (2), Asn6936, Thr6934 | His69729, Lys6939 | His69729 (2), Ser6872, Asn6936 | - |
|       | $\pi$ -Anion           | Asp6873                                        | -                                      | -                              | - | -           | -           | -                         | -                              | -                 | -                              | - |
|       | $\pi$ -Sulfur          | -                                              | Cys6913                                | -                              | - | -           | -           | -                         | -                              | -                 | -                              | - |
|       | $\pi$ - $\pi$ Stacked  | -                                              | Tyr6930                                | -                              | - | -           | -           | -                         | Tyr6930, His6972               | Tyr6930, His6972  | Tyr6930, His6972               | - |

|  |                          |   |   |   |   |             |         |                     |         |   |   |   |
|--|--------------------------|---|---|---|---|-------------|---------|---------------------|---------|---|---|---|
|  | Halogen                  | - | - | - | - | Asp693<br>1 | Asp6931 | Asp6931             | Asp6931 | - | - | - |
|  | $\pi$ -Sigma             | - | - | - | - | -           | -       | Pro6932             | -       | - | - | - |
|  | Aminde- $\pi$<br>Stacked | - | - | - | - | -           | -       | Ser6872,<br>Asp6873 | -       | - | - | - |

**Table S7.** The Tirilazad interactions with 3CL<sup>pro</sup>, PL<sup>pro</sup>, NSP12 and NSP16 obtained at 10 ns intervals from 100 MD simulation trajectories. The brackets beside the amino acid depicted the number of interactions that particular residue has formed.

| Proteins           | Types of bonds   | Pre-MD Simulation            | Post MD Simulation            |                           |                                |                         |                                   |                                 |                           |                                                 |                                                        |                                      |
|--------------------|------------------|------------------------------|-------------------------------|---------------------------|--------------------------------|-------------------------|-----------------------------------|---------------------------------|---------------------------|-------------------------------------------------|--------------------------------------------------------|--------------------------------------|
|                    |                  |                              | 10 ns                         | 20 ns                     | 30 ns                          | 40 ns                   | 50 ns                             | 60 ns                           | 70 ns                     | 80 ns                                           | 90 ns                                                  | 100 ns                               |
| 3CL <sup>pro</sup> | H-Bond           | Arg188                       |                               |                           |                                |                         |                                   |                                 |                           |                                                 |                                                        |                                      |
|                    | $\pi$ -Cation    | Arg105                       |                               |                           |                                |                         |                                   |                                 |                           |                                                 |                                                        |                                      |
|                    | $\pi$ -Alkyl     | Phe134, Phe181               |                               |                           |                                |                         |                                   |                                 |                           |                                                 |                                                        |                                      |
|                    | Alkyl            | Val186, Cys85, Pro52, Arg188 |                               |                           |                                |                         |                                   |                                 |                           |                                                 |                                                        |                                      |
| PL <sup>pro</sup>  | H-Bond           | Thr301                       | -                             | -                         | Arg166                         | -                       | Arg166                            | -                               |                           | -                                               | Ser170                                                 |                                      |
|                    | $\pi$ -Anion     | Glu167, Asp164               | -                             | -                         |                                | -                       | -                                 | -                               |                           | -                                               | -                                                      |                                      |
|                    | $\pi$ - $\sigma$ | Tyr264                       | -                             | -                         |                                | -                       | -                                 | -                               |                           | -                                               | -                                                      |                                      |
|                    | $\pi$ -Alkyl     | Tyr264                       | Tyr264(2), Tyr273             | Tyr264(2)                 | Tyr264, Ar166                  | Tyr264 (3), Arg166      | Tyr264(3), Arg166                 | Tyr264(2), Arg166               |                           | Phe173, Tyr264                                  | Phe173                                                 |                                      |
|                    | Alkyl            | Leu162, Pro248               | Met208, Pro247(2), Pro248(2), | Pro247(2), Pro248, Met208 | Ar166, Met208, Pro248, Leu162, | Met206, Met208, Leu162, | Arg166, Met208(2), Pro248, Leu162 | Arg166, Val202, Met206, Met208, | Met206(2), Pro247, Pro248 | Arg166, Val202, Met206, Met208, Pro247, Pro248, | Arg166, Met206, Met208 (2), Met243, Pro247 (2), Pro248 | Val202, Met206, Met208(3), Pro247(3) |
|                    | C-H              | Asp164, Glu167               | -                             |                           | -                              | Pro2248                 | Pro248, Asp164                    | Asp164 (2),                     |                           | -                                               | Ser245 (2)                                             |                                      |

|       |               |                                              |                    |                       |                                         |                      |                                                             |               |                                                       |                   |        |        |
|-------|---------------|----------------------------------------------|--------------------|-----------------------|-----------------------------------------|----------------------|-------------------------------------------------------------|---------------|-------------------------------------------------------|-------------------|--------|--------|
|       | II-sulfur     |                                              |                    |                       | Met208                                  | -                    | Met208                                                      | -             | Met206                                                | Met206            | -      |        |
|       | II-donor      |                                              |                    |                       |                                         |                      |                                                             |               |                                                       |                   | Ser170 |        |
|       | II-orbitals   |                                              |                    |                       |                                         |                      |                                                             |               |                                                       |                   |        | Met206 |
| NSP12 | H-Bonds       | Trp800                                       | Ala550,<br>Lys551, | -                     | -                                       | -                    | -                                                           | -             | -                                                     |                   |        |        |
|       | Alkyl         | Lys593, Met601,<br>Val588, Leu758,<br>Cys813 | Cys813             | Ala547                | Ala547,<br>Leu576,<br>Ala580,<br>Ala685 | Ala547(2),<br>Val557 | Lys545(2),<br>Ala547(3),<br>Arg555(2),<br>Ala688,<br>Val557 | Ile589,Ala685 | Leu576,<br>Ala580,<br>Ile589,<br>Ala685(2),<br>Ala688 | Leu576,<br>Ala685 |        |        |
|       | $\pi$ -Alkyl  | Phe594, Phe812,                              | -                  | -                     | -                                       | -                    |                                                             | His439        | Ile589                                                |                   |        |        |
|       | C-H Bond      | Thr591                                       | -                  | Ser759(4),<br>Thr 591 | -                                       | -                    | Gly683,<br>Asn496                                           | -             | -                                                     |                   |        |        |
|       | $\pi$ -Sulfur | Cys813                                       | -                  | -                     | -                                       | -                    | -                                                           | -             | -                                                     |                   |        |        |

**Table S8.** The Acetyldigitoxin interactions with 3CL<sup>pro</sup>, NSP13, NSP14 AND NSP16 obtained at 10 ns intervals from 100 MD simulation trajectories. The brackets beside the amino acid depicted the number of interactions that particular residue has formed.

| Proteins           | Types of bonds    | Pre-MD Simulation                                           | Post MD Simulation     |                |                        |                        |                    |                   |                                |                                    |                        |            |
|--------------------|-------------------|-------------------------------------------------------------|------------------------|----------------|------------------------|------------------------|--------------------|-------------------|--------------------------------|------------------------------------|------------------------|------------|
|                    |                   |                                                             | 10 ns                  | 20 ns          | 30 ns                  | 40 ns                  | 50 ns              | 60 ns             | 70 ns                          | 80 ns                              | 90 ns                  | 100 ns     |
| 3CL <sup>pro</sup> | H-Bond            | Thr26, Gln74, His163, Glu166, Cys145, Asn142, Thr25, Gly143 | Asn142, Glu166         | -              | -                      | Asn142                 | -                  | -                 | Asn288, Asn231                 | -                                  | Asn288, Asn231         | -          |
|                    | Alkyl             | Cys145, Leu27, Leu67, Met49, Met165                         | -                      | -              | -                      | Leu141                 | -                  | -                 | Met235, Pro184, Leu232, Met235 | Met235, Pro241, Met235, Leu232 (2) | Pro241 (2), Met235     | Leu232 (2) |
|                    | C-H bond          | -                                                           | Glu166 (2)             | -              | -                      | -                      | -                  | -                 | -                              | -                                  | -                      | -          |
|                    | $\pi$ -Alkyl      | -                                                           | -                      | Try118         | -                      | -                      | -                  | -                 | -                              | -                                  | -                      | -          |
| NSP13              | H-Bond            | Gln537, Ser310, Ala313, Ala312                              | -                      | Thr532         | Arg409                 | Ser539 (2)             | Arg178, Asp534     | Arg567            | Gln531, Glu201                 | Arg161, Gly213, Gln531, Ser539     | Arg178, Ser539         | Asp534     |
|                    | Alkyl             | Ala312, Cys309, Lys139, Glu142                              | Ala407, Arg178, Val181 | -              | Ala316, Met378, Ala407 | Ala312, Met378, Ala407 | Ala312, Ala407 (2) | Ala312, Lys288    | Arg212, Val210                 | Val510, Tyr541                     | -                      | -          |
|                    | C-H bond          | Ser535, Glu142                                              | Ser535, Ala407         | Arg409, Ser535 | Met378 (2)             | His311, Gly538         | His311, Met378 (2) | -                 | -                              | Arg212 (2), Gly538, Ser539         | Arg212, Gly538, Ser539 | -          |
|                    | Attractive Charge | -                                                           | -                      | Arg178         | -                      | -                      | -                  | Arg567            | Arg161                         | -                                  | -                      | -          |
| NSP14              | H-Bonds           | Glu375, Glu145                                              | Asp350, Asp382         | Tyr510, Tyr385 | -                      | -                      | Ser70, Asn508      | Asn508            | Asn121, Asn508                 | -                                  | -                      | -          |
|                    | Alkyl             | Leu144, Ala348                                              | Ala348                 | Val343         | Ile54, Lys341, Met62   | Val59, Met62 (2)       | Leu120 (2)         | Met62 (2), Leu120 | Met62 (3), Val59, Lys74        | Val59 (4), Met62 (2)               | Met62 (2)              | -          |

|       |              |                                    |                        |                               |                      |         |            |                |                       |                  |            |   |
|-------|--------------|------------------------------------|------------------------|-------------------------------|----------------------|---------|------------|----------------|-----------------------|------------------|------------|---|
|       | $\pi$ -Alkyl | Tyr127, Phe504, His378, His401     | His378 (20), Phe504(2) | His378, His401, Tyr510 (2)    | Tyr50, Trp349        | -       | -          | Tyr50          | Tyr50                 | Tyr50            | -          | - |
|       | C-H Bond     | Trp349, Ala348                     | Asp382 (2)             | His401                        | Ser47                | -       | Asn508 (2) | Asn121, Asn508 | Ser70, Asn121, Asn508 | Gly66            | Ser124 (2) |   |
| NSP16 | H-Bond       | Lys6935, Lys6844, Lys6968, Tyr6930 | Ser6999 (2), Glu7001   | Ser6999 (2), Ser6998, Glu7001 | Tyr6828 (2)          | -       | -          | -              | Lys6958               | -                | -          | - |
|       | $\pi$ -Alkyl | Tyr6930, Phe6947                   | Tyr6828, Tyr6930       | Tyr6930                       | -                    | Tyr6828 | -          | -              | Tyr6950 (3)           | His6917, Tyr6950 | Tyr6950    | - |
|       | Alkyl        | Pro6932, Leu6898                   | Pro6932                | Pro6932, Met6840              | Pro6932 (2), Lys6933 | -       | -          | -              | -                     | -                | Ala6914    | - |
|       | C-H Bond     | Tyr6930                            | Asn6996 (2)            | Ser6999, Ser6998, Asn6996     | -                    | Asn6827 | -          | -              | -                     | -                | -          | - |

**Table S9.** The Ledipasvir interactions with PL<sup>pro</sup>, NSP12, NSP14 and NSP16 obtained at 10 ns intervals from 100 ns MD simulation trajectories. The brackets beside the amino acid depicted the number of interactions that particular residue has formed.

| Proteins          | Types of bonds        | Pre-MD Simulation      | Post MD Simulation                     |                           |                         |                            |                      |                                   |                |                                |                |                |
|-------------------|-----------------------|------------------------|----------------------------------------|---------------------------|-------------------------|----------------------------|----------------------|-----------------------------------|----------------|--------------------------------|----------------|----------------|
|                   |                       |                        | 10 ns                                  | 20 ns                     | 30 ns                   | 40 ns                      | 50 ns                | 60 ns                             | 70 ns          | 80 ns                          | 90 ns          | 100 ns         |
| PL <sup>pro</sup> | H-Bonds               | Asp164, Tyr273         | -                                      | Gln174                    | Gln174                  | Gln174                     | Met208               | Gly209                            | -              | -                              | -              | -              |
|                   | Alkyl                 | Met208, Pro248         | Arg166                                 | Arg166, Met208(2)         | Val202                  | Val202 (2), Met206         | Arg166(2), Met206(3) | Met206, Pro247(2), Ala249, Val202 | -              | Met206, Pro247, Pro248, Val202 | Met206, Val202 | -              |
|                   | $\pi$ -Alkyl          | Tyr264                 | Tyr171, Tyr207, Arg166                 | Tyr171, Met208, Arg166    | -                       | -                          | Met208               | Pro247, Met208(2)                 | -              | Pro247, Met208(2)              | Pro247, Met208 | Met205         |
|                   | C-H Bond              | Gly163                 | -                                      | Gln174                    | -                       | -                          | Met206, Glu203       | Gly209(2), Pro247                 | -              | Pro247, Pro248                 | Pro248         | Pro247, Gln215 |
|                   | Halogen (Fl)          | Glu167                 | -                                      | -                         | Asp164, Arg166          | -                          | -                    | -                                 | -              | -                              | -              | -              |
|                   | $\pi$ -Anion          | Glu167                 | -                                      | -                         | -                       | -                          | -                    | -                                 | -              | -                              | -              | -              |
|                   | $\pi$ - $\pi$ Stacked | -                      | Tyr171(2)                              | Tyr171                    | Tyr171                  | -                          | -                    | -                                 | -              | -                              | -              | -              |
|                   | $\pi$ -Sulfur         | -                      | -                                      | -                         | -                       | -                          | -                    | -                                 | -              | -                              | Met208         | -              |
| NSP12             | H-Bonds               | -                      | Ala550, Tyr689                         | Tyr689                    | Gly590, Tyr689          | His439, Tyr689(2),         | Tyr689, Arg836       | Tyr689                            | Tyr689, Ser814 | Tyr689                         | Tyr689, Ser814 | Ser549, Tyr689 |
|                   | CH bond               | Pro620, Ser759, Asn496 | Ser549, Ala685, Gly683, Tyr689, Ser549 | Ala685(2), Arg836, His439 | Ile589, Ser814, Ala685, | Ile589, Tyr689, Ile548(2), | -                    | Ile589, Ala685,                   | -              | -                              | Asn496         | Ser549, Ala685 |
|                   | $\pi$ -Sigma          | Ala688                 | -                                      | -                         | Ser814                  | -                          | -                    | -                                 | -              | -                              | -              | -              |



|       |                      |                                           |                                |                                                      |                                        |                                                |                                                                   |                                        |                                        |                                        |                                        |                                           |
|-------|----------------------|-------------------------------------------|--------------------------------|------------------------------------------------------|----------------------------------------|------------------------------------------------|-------------------------------------------------------------------|----------------------------------------|----------------------------------------|----------------------------------------|----------------------------------------|-------------------------------------------|
|       | Alkyl                | Lys500, Ala685, Leu576, Ile589, Lys798    | Ala580(2), Ala685, Lys577      | Ala580(2), Ala688, Ile589, Ile548(2), His439, Tyr689 | Ala580, Ala685, Ala688, Ile589, Lys577 | Ala688, Cys813, Ile589, Ile494, Lys577, Ile548 | Ala547(2), Ala580, Ala685, Ala688, Ile589, Ile494, Lys577, Ile548 | Ala688, Cys813, Ile589, Ile494, Lys577 | Ala685, Ala688, Ile589, Ile494, Lys577 | Ala580, Ala685, Ile589, Ile494, Lys577 | Ala580, Ala688, Ile589, Ile494, Lys577 | Ala580(2), Ala685, Ala688, Ile589, Lys577 |
|       | $\pi$ - Donor H-bond | Ser759                                    | -                              | -                                                    | -                                      | -                                              | -                                                                 | -                                      | -                                      | -                                      | -                                      | -                                         |
|       | $\pi$ -Anion         | Asp761                                    | -                              | -                                                    | -                                      | -                                              | -                                                                 | -                                      | -                                      | -                                      | -                                      | -                                         |
|       | $\pi$ --Alkyl        | -                                         | -                              | His439, Tyr689                                       | His439, Tyr689                         | His439                                         | His439, Tyr689                                                    | Tyr689, Cys813                         | His-439, Tyr-689, Leu758, Cys813(2)    | Cys813                                 | Cys813(2)                              |                                           |
|       | Halogen (Fl)         | -                                         | -                              | -                                                    | Val588, Ile589                         | -                                              | -                                                                 | -                                      | -                                      | -                                      | -                                      | -                                         |
|       | Amide $\pi$ -stacked | -                                         | -                              | -                                                    | Cys813, Ser814                         | -                                              | -                                                                 | -                                      | Cys813, Ser814,                        | -                                      | -                                      | -                                         |
| NSP14 | H-Bonds              | Arg310, Trp385, Cys387                    | Asn386                         | Asn386                                               | Arg289, Asn386(2)                      | Asn386                                         | Asn386                                                            | Arg289, Asn386                         | Asp390, Trp385                         | Arg289(2), Asn386,                     | Asn386                                 | Cys309, Asn386(2)                         |
|       | Alkyl                | Arg310, Pro335                            | Val290, Pro429, Leu259, Cys309 | Val290, Cys309                                       | Val290, Arg391, Cys309                 | Val290, Cys309                                 | Val287, Cys309, Pro335                                            | Cys309                                 |                                        | Pro429, Pro429, Cys309                 | Ile305, Cys309                         | Val287, Cys309                            |
|       | $\pi$ -Alkyl         | Trp292, Pro335(2), Pro429, Phe367, Val290 | Tyr260, Phe426, Val287, Pro429 | Phe367, Tyr420, His424, Val290                       | Phe367, Val290, Pro429, Val290         | Tyr-420, Phe-426, Val389, Pro429, Val290       | Trp292, Phe426, Pro429, Val290                                    | Pro429, Arg289                         | Trp292(2), Phe426, Pro429              | Trp292                                 | Phe367, Phe426, Pro429                 | His283, Pro429                            |
|       | C-H Bond             | Gln313                                    | Trp385                         | Trp385                                               |                                        | Trp385                                         | Trp385                                                            | Val389, Asn306(2)                      | Trp385, Asp390, Asn388                 |                                        | Trp385                                 | Trp385, Leu259, Tyr260                    |
|       | Halogen (Fl)         | Asn388                                    | -                              | -                                                    | -                                      | -                                              | -                                                                 | Arg289, Asn388                         | Asn388                                 | Arg289, Asn388,                        | Asn388                                 | -                                         |

|                        |                        |                                                      |                           |                           |                           |                                    |                                    |                           |        |                           |                              |                           |
|------------------------|------------------------|------------------------------------------------------|---------------------------|---------------------------|---------------------------|------------------------------------|------------------------------------|---------------------------|--------|---------------------------|------------------------------|---------------------------|
|                        | $\pi$ - $\pi$ T-shaped | Trp292, Phe367                                       | -                         | -                         | Phe426                    | Phe-426                            | Phe426                             | -                         | -      | -                         | -                            | -                         |
|                        | $\pi$ -Donor H-bond    | -                                                    | Phe426                    | -                         | -                         | -                                  | Phe426                             | Phe426                    | Asn388 | Asn388                    | -                            | -                         |
|                        | $\pi$ -Cation          | -                                                    | -                         | Arg289                    | Arg289                    | Arg289                             | -                                  | -                         | Arg289 | -                         | -                            | -                         |
|                        | $\pi$ - $\pi$ Stacked  | -                                                    | -                         | -                         | Phe367                    | Phe6947                            | -                                  | -                         | -      | -                         | -                            | -                         |
|                        | $\pi$ -Lone Pair       | -                                                    | -                         | -                         | -                         | Asn388                             | -                                  | -                         | -      | -                         | -                            | -                         |
| NSP16                  | H-Bond                 | Lys6844, Asp6873, Lys6968, Gly6946, Phe6947, Asp6912 | Phe6947, Asp6873, Glu6945 | Phe6947, Asp6873, Glu6945 | Phe6947, Asp6873, Glu6945 | Glu6945, Phe6947, Asp6873, Glu6945 | Glu6945, Phe6947, Asp6873, Glu6945 | Glu6945, Phe6947, Asp6873 | -      | Glu6945, Phe6947, Asp6873 | Glu6945, Phe6947, Glu6945    | Phe6947, Asp6873, Glu6945 |
|                        | $\pi$ -Sigma           | Leu6898                                              | -                         | -                         | -                         | -                                  | -                                  | -                         | -      | -                         | -                            | -                         |
|                        | $\pi$ -Alkyl           | Phe6947, Tyr6930                                     | Tyr6930, Phe6948          | Phe6948                   | Phe6948, Leu6898          | Tyr6930, Phe6948, Met6929(2)       | Phe6948, Met6929(2)                | Tyr6930, Phe6948          | -      | Met6929(2)                | Phe6948, Met6929             | Met6929(2), Leu6898,      |
|                        | $\pi$ -Anion           | Asp6897                                              | -                         | -                         | -                         | -                                  | -                                  | -                         | -      | -                         | -                            | -                         |
|                        | C-H bond               | Asn6841                                              | Pro6936, Gly6946          | Pro6932                   | Pro6932, Gly6946          | -                                  | -                                  | -                         | -      | -                         | Gly6946, Pro6932(2), Gly6946 | Pro6932, Glu7001          |
|                        | $\pi$ -Donor H bond    | Tyr6930                                              | -                         | -                         | -                         | Asp6873                            | -                                  | Asp6873, Tyr6930          | -      | Tyr6930                   | Asp6873                      | -                         |
|                        | Halogen (F1)           | Tyr6930                                              | -                         | -                         | -                         | Tyr6930                            | Tyr6930                            | Tyr6930                   | -      | Tyr6930                   | -                            | Tyr6930                   |
| $\pi$ - $\pi$ T-shaped | -                      | -                                                    | -                         | -                         | -                         | Phe6947                            | -                                  | -                         | -      | -                         | Phe6947                      |                           |

|                         |   |                                         |                                             |                                         |                                     |                                 |                                             |   |                     |                                             |                                    |   |
|-------------------------|---|-----------------------------------------|---------------------------------------------|-----------------------------------------|-------------------------------------|---------------------------------|---------------------------------------------|---|---------------------|---------------------------------------------|------------------------------------|---|
| $\pi$ - $\pi$ Stacked   | - | Phe6947<br>(2)                          | -                                           | -                                       | -                                   | -                               | -                                           | - | -                   | -                                           | Phe6947(2)                         | - |
| Alkyl                   | - | Met6839<br>(2),<br>Lys6874,<br>Pro6878, | Lys6874,<br>Met6839,<br>Lys6874,<br>Pro6878 | Met683<br>9,<br>Val6876<br>,<br>Pro6878 | Met6839<br>,<br>Val6876,<br>Pro6878 | Lys6874,<br>Val6876,<br>Met6929 | Lys6874,<br>Val6876,<br>Pro6878,<br>Met6929 | - | Lys6874,<br>Lys6874 | Met6839,<br>Val6879,<br>Pro6878,<br>Lys6944 | Lys6874(2),<br>Val6875,<br>Lys6944 |   |
| Amide- $\pi$<br>Stacked | - | -                                       | -                                           | -                                       | -                                   | Asp6928,<br>Met6929             | Asp6928                                     | - | Asp6928             | Asp6928,<br>Met6929                         | -                                  |   |
| $\pi$ - Sulfur          | - | -                                       | -                                           | -                                       | -                                   | -                               | Cys6913                                     | - | -                   | -                                           | -                                  |   |
| Attractive<br>charge    | - | -                                       | Lys6968                                     | Lys6968                                 | -                                   | -                               | -                                           | - | -                   | -                                           | -                                  |   |

## Repurposed drugs of SARS-CoV2

### RdRp

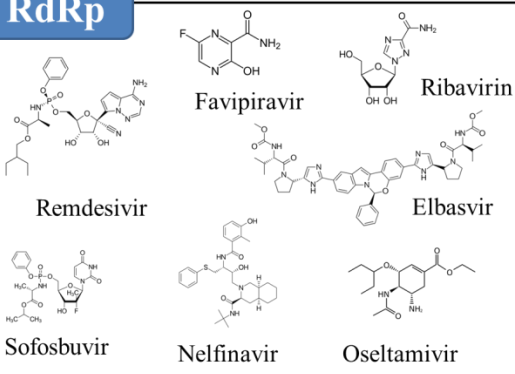

### Protease

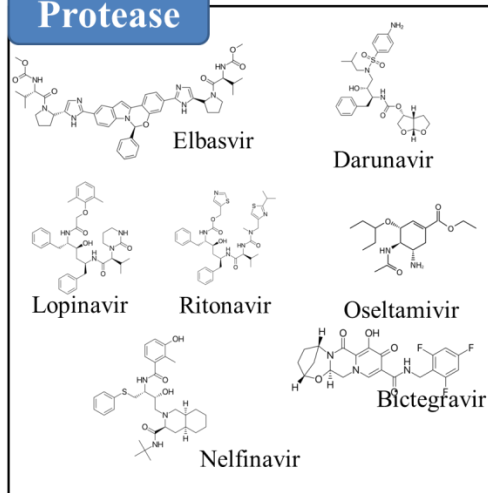

### ACE2

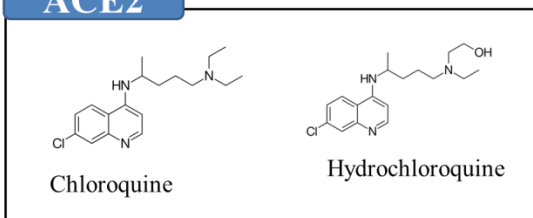

### Helicase

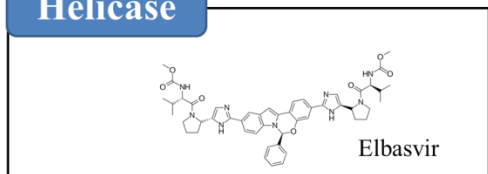

### Spike

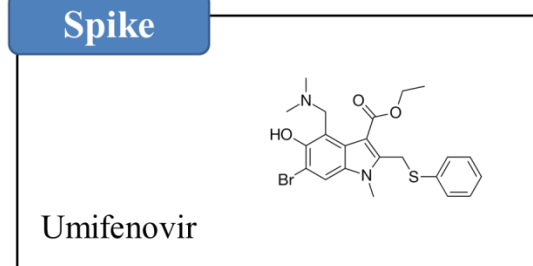

### Membrane fusion

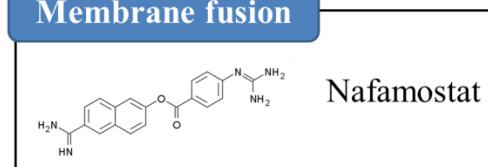

*RdRp, Protease and helicase inhibitors affect the viral replication; ACE2, Spike and membrane fusion inhibitors block the viral entry.*

**Figure S1.** Reported SARS-CoV2 repurposable candidates with their targets and mechanism of action.

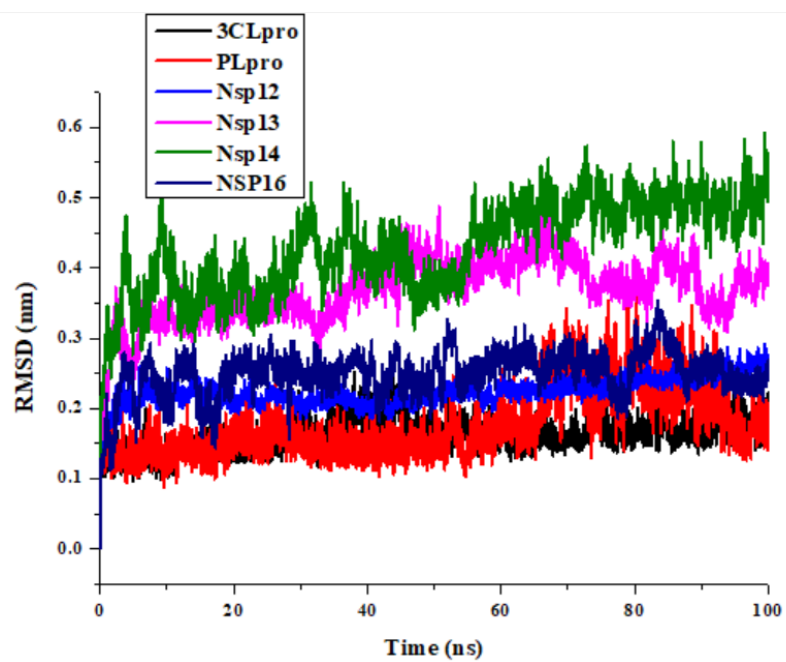

**Fig. S2.** The backbone RMSD of Apo protein structures.

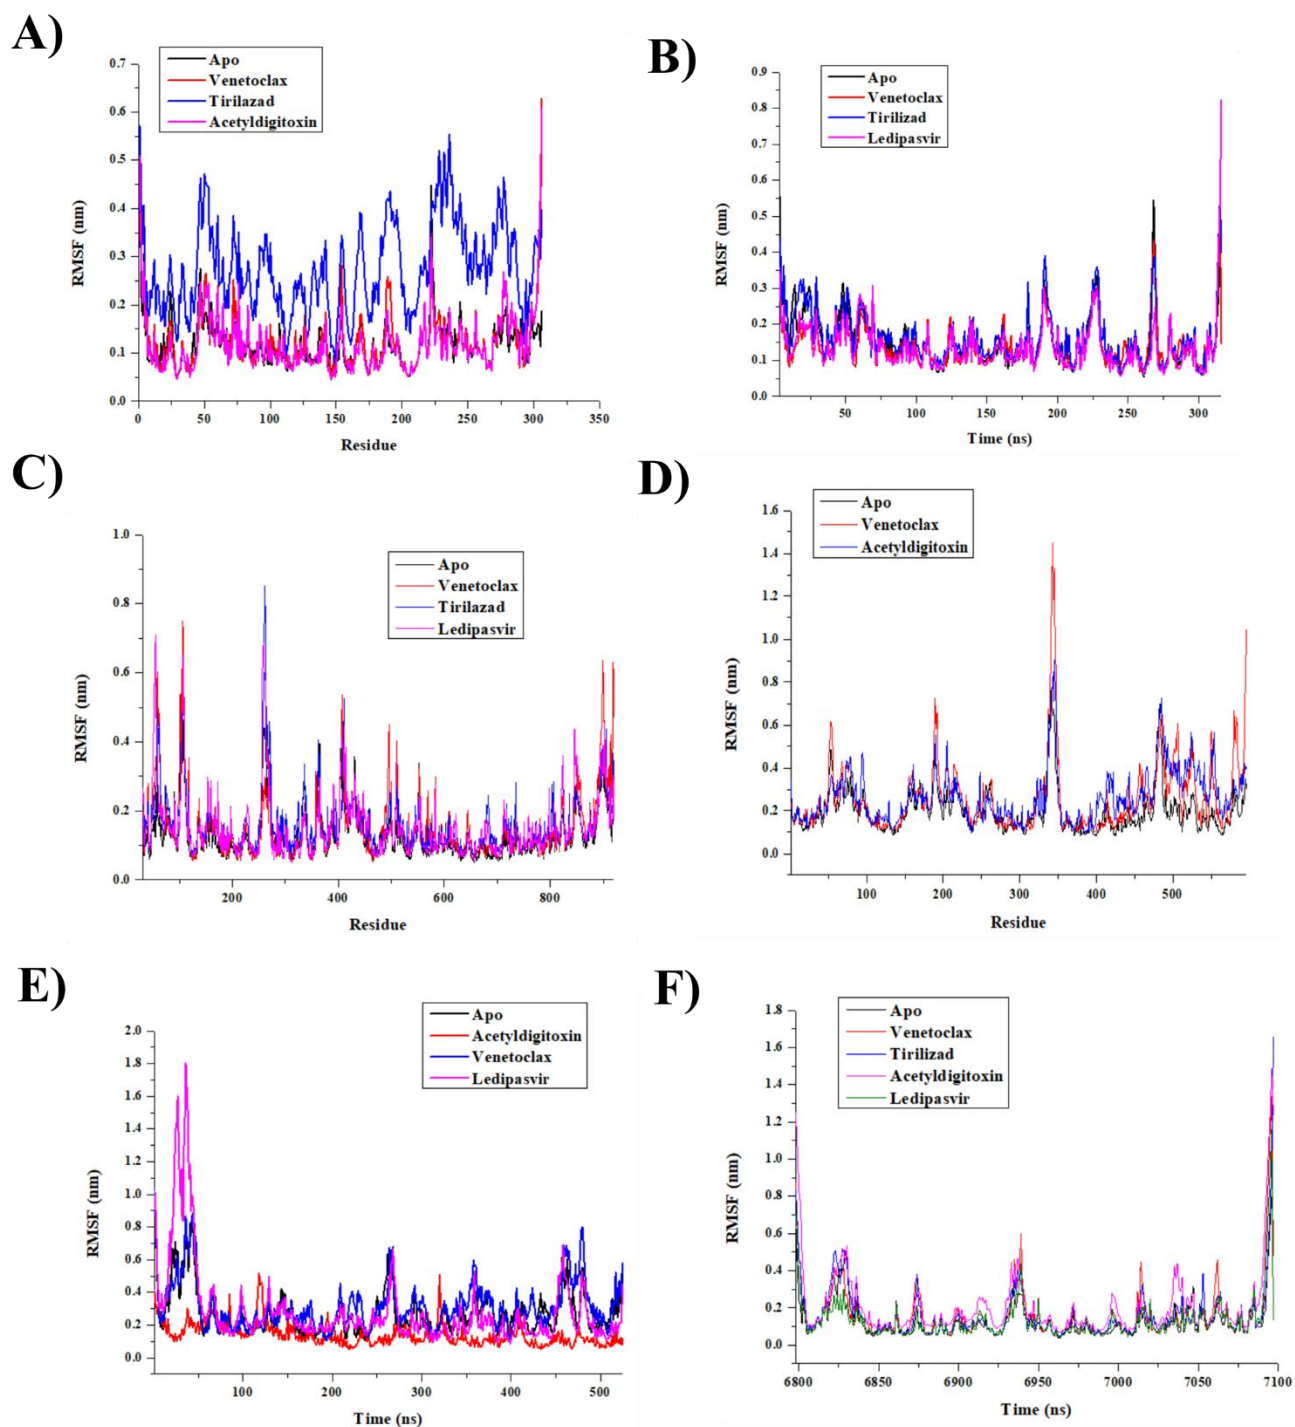

**Fig. S3.** RMSF analysis of (A) 3CL<sup>pro</sup> (B) PL<sup>pro</sup> (C) NSP12 (D) NSP13 (E) NSP14 and (F) NSP16 in presence of four drugs with apo protein.

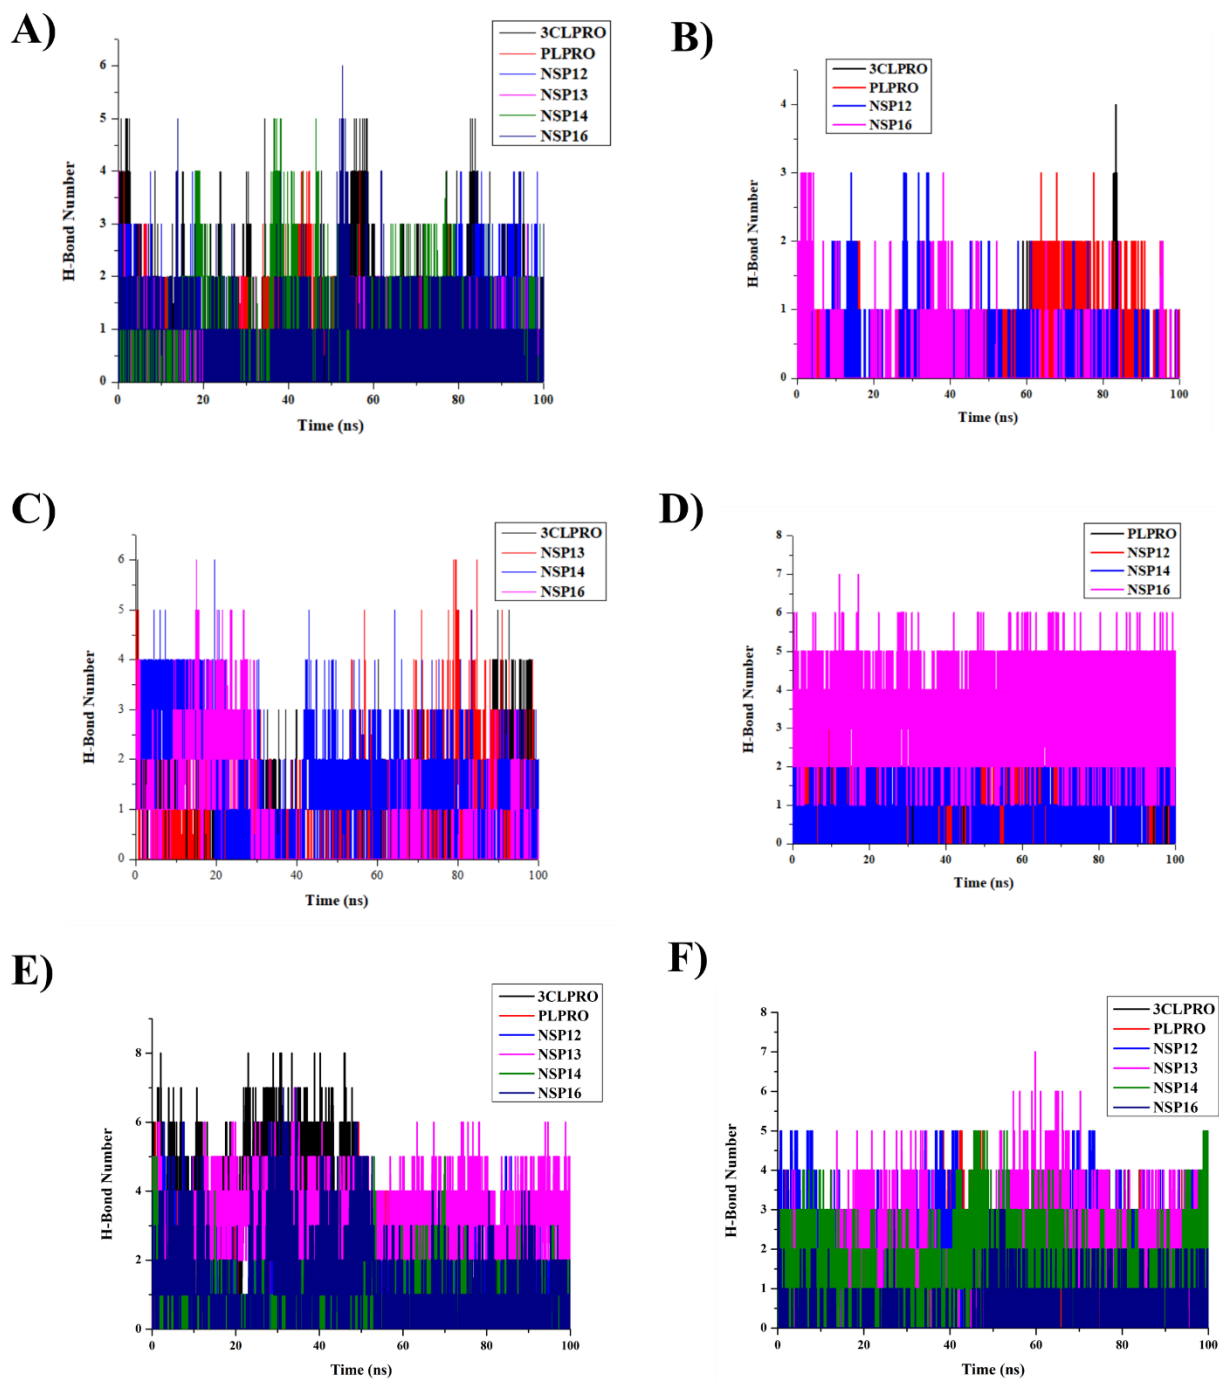

**Fig. S4.** Number of hydrogen bond interactions between the SARS-CoV-2 proteins and (A) Venetoclax, (B) Tirilazad (C) Acetyldigitoxin and (D) Ledipasvir (E) Nafamostat and (F) Elbasvir drug molecules throughout the 100 ns timescale.

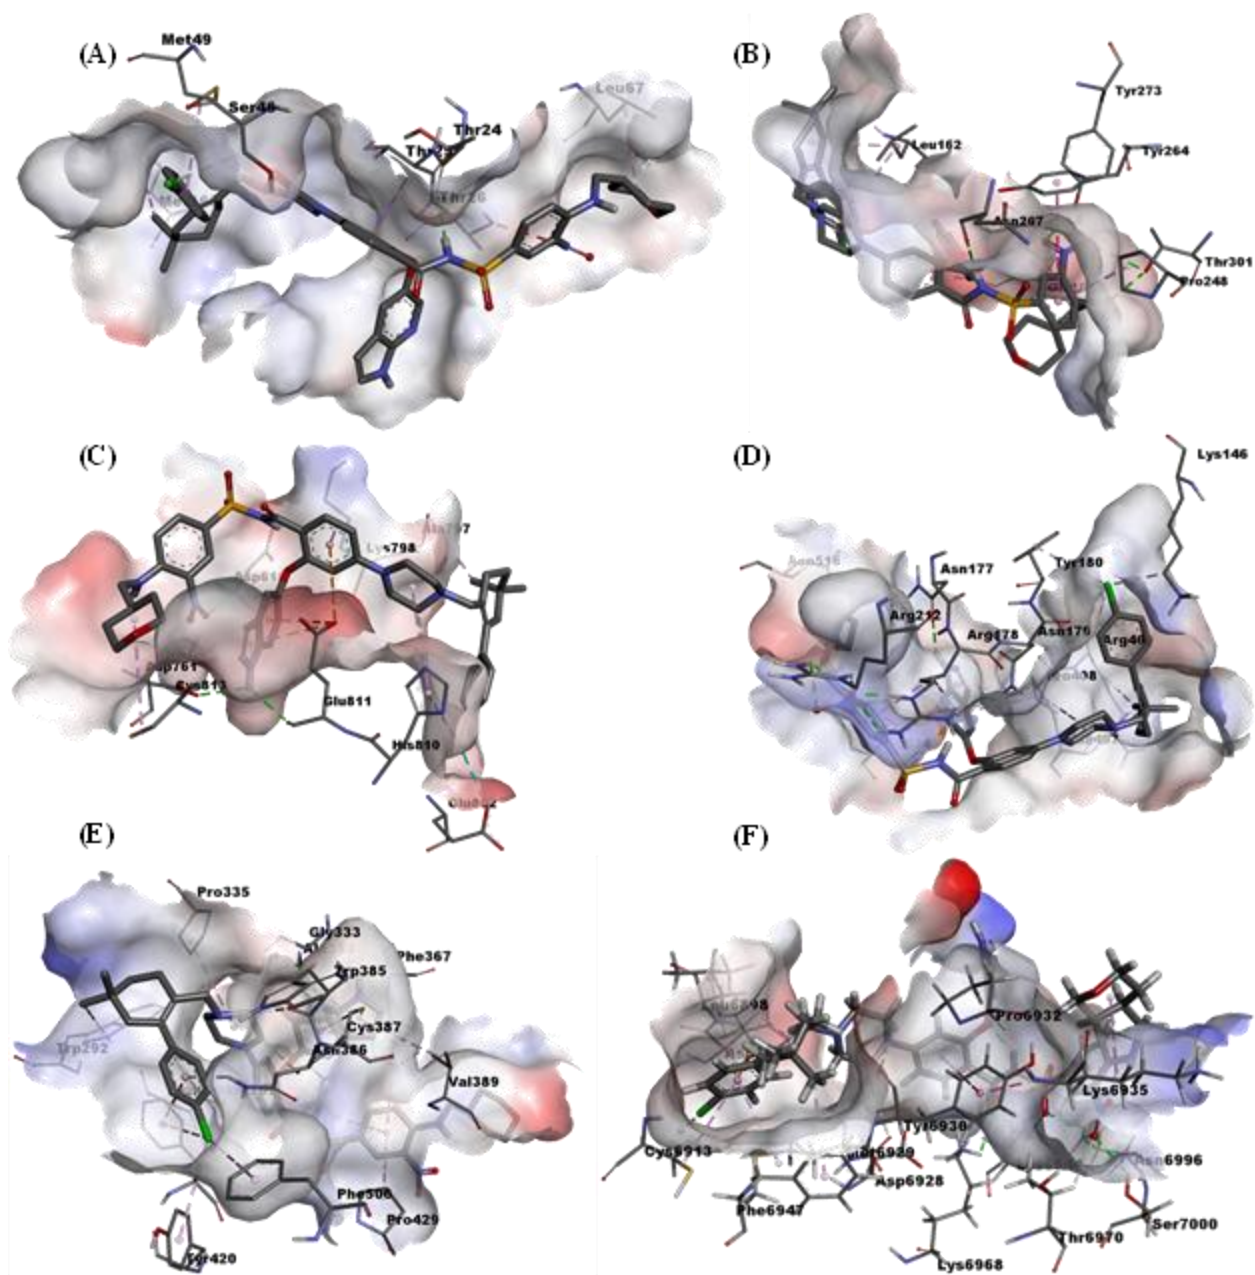

**Fig. S5.** Electrostatic interaction diagram of Venetoclax with SARS-CoV-2 protein targets (A) 3CLpro (B) PLpro (C) NSP12 (D) NSP13 (E) NSP14 and (F) NSP16.



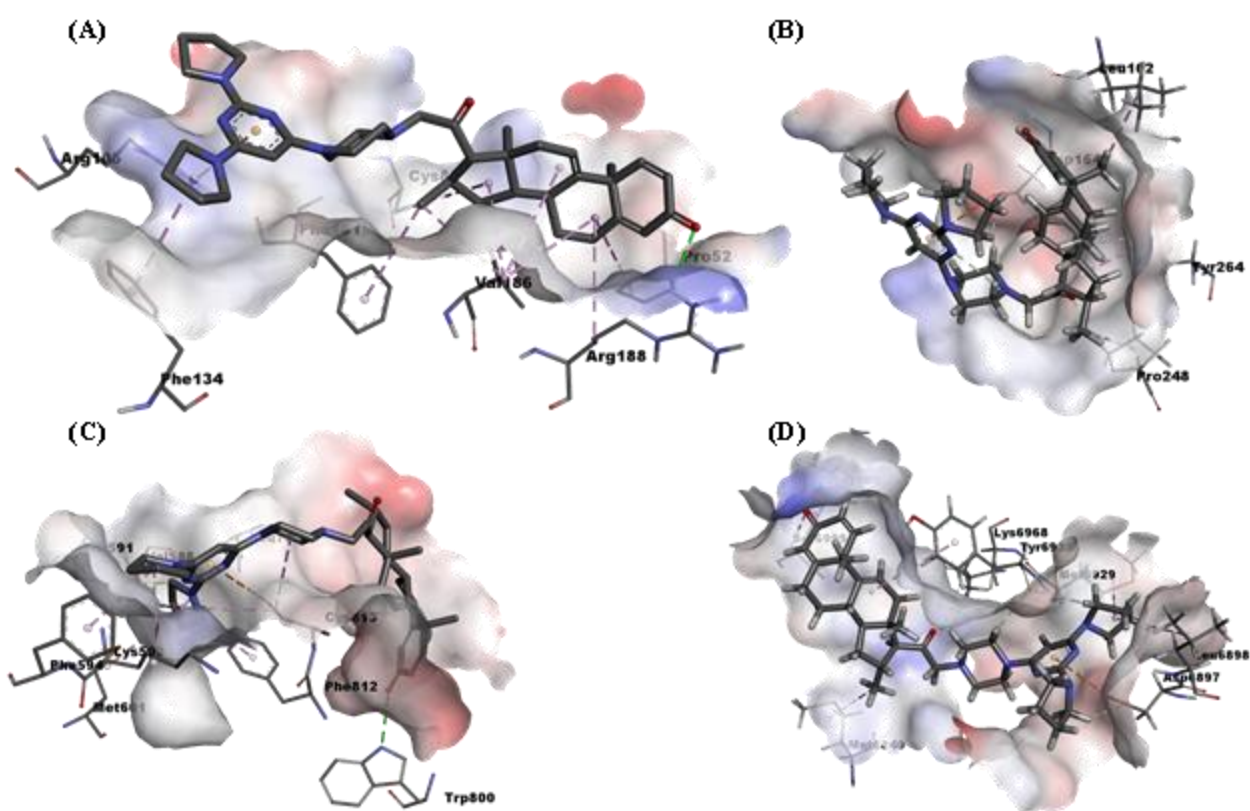

**Fig. S6.** Electrostatic interaction diagram of Tirilazad with SARS-CoV-2 protein targets (A) 3CLpro (B) PLpro (C) NSP12 (D) and NSP16.

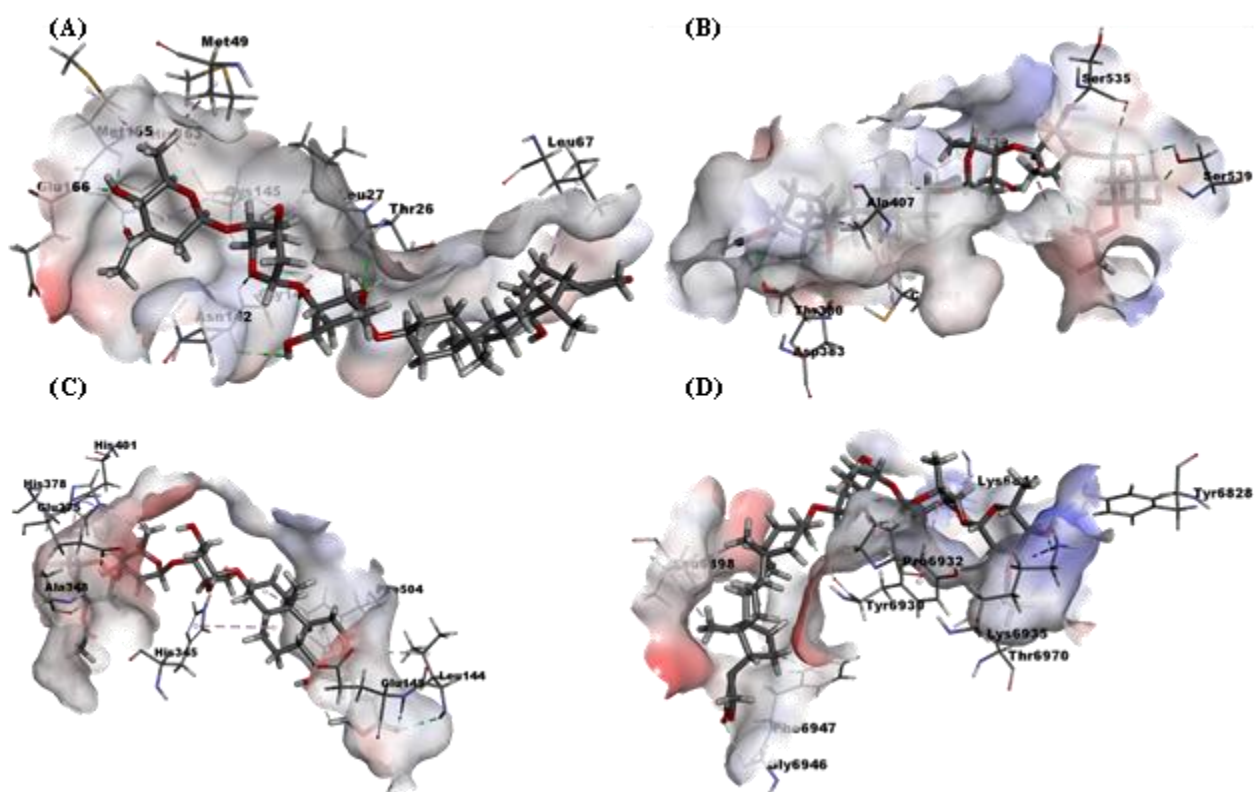

**Fig. S7.** Electrostatic interaction diagram of Acetyldigitoxin with SARS-CoV-2 protein targets (A) 3CLpro (B) NSP13 (C) NSP14 (D) and NSP16.

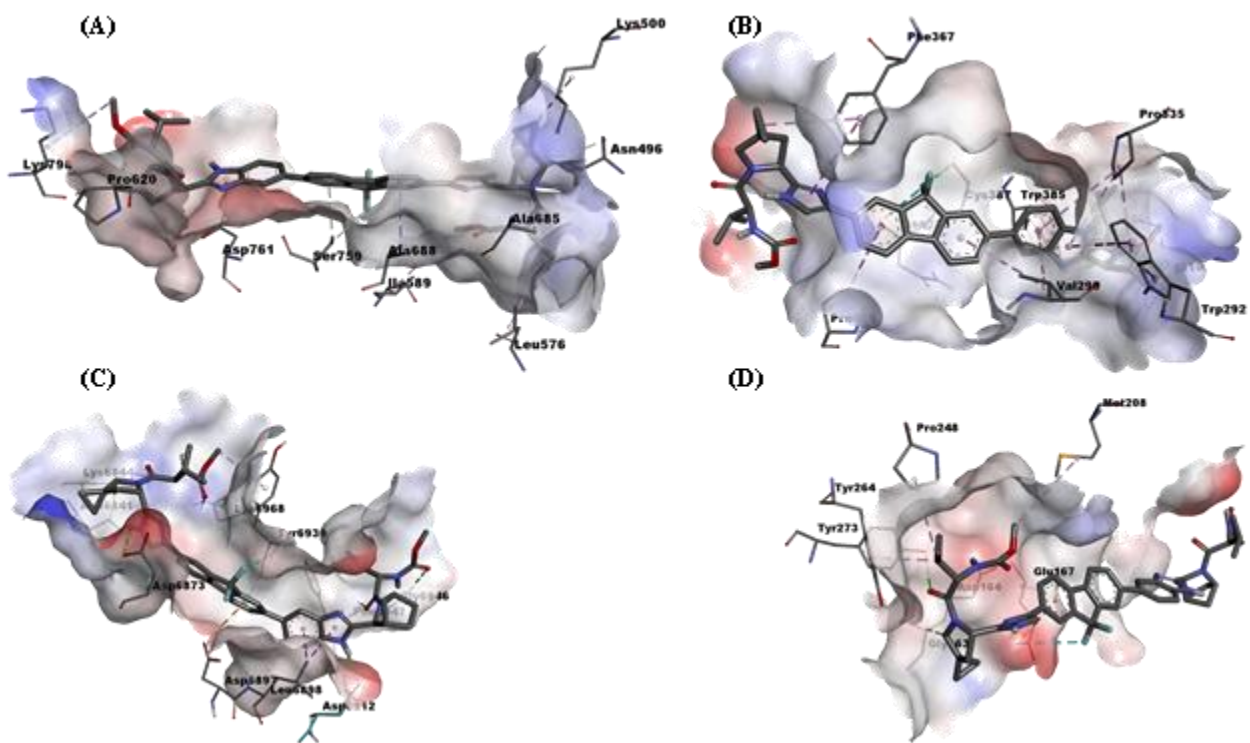

**Fig. S8.** Electrostatic interaction diagram of Ledipasvir with SARS-CoV-2 protein targets (A) PLpro (B) NSP12 (C) NSP14 (D) and NSP16.

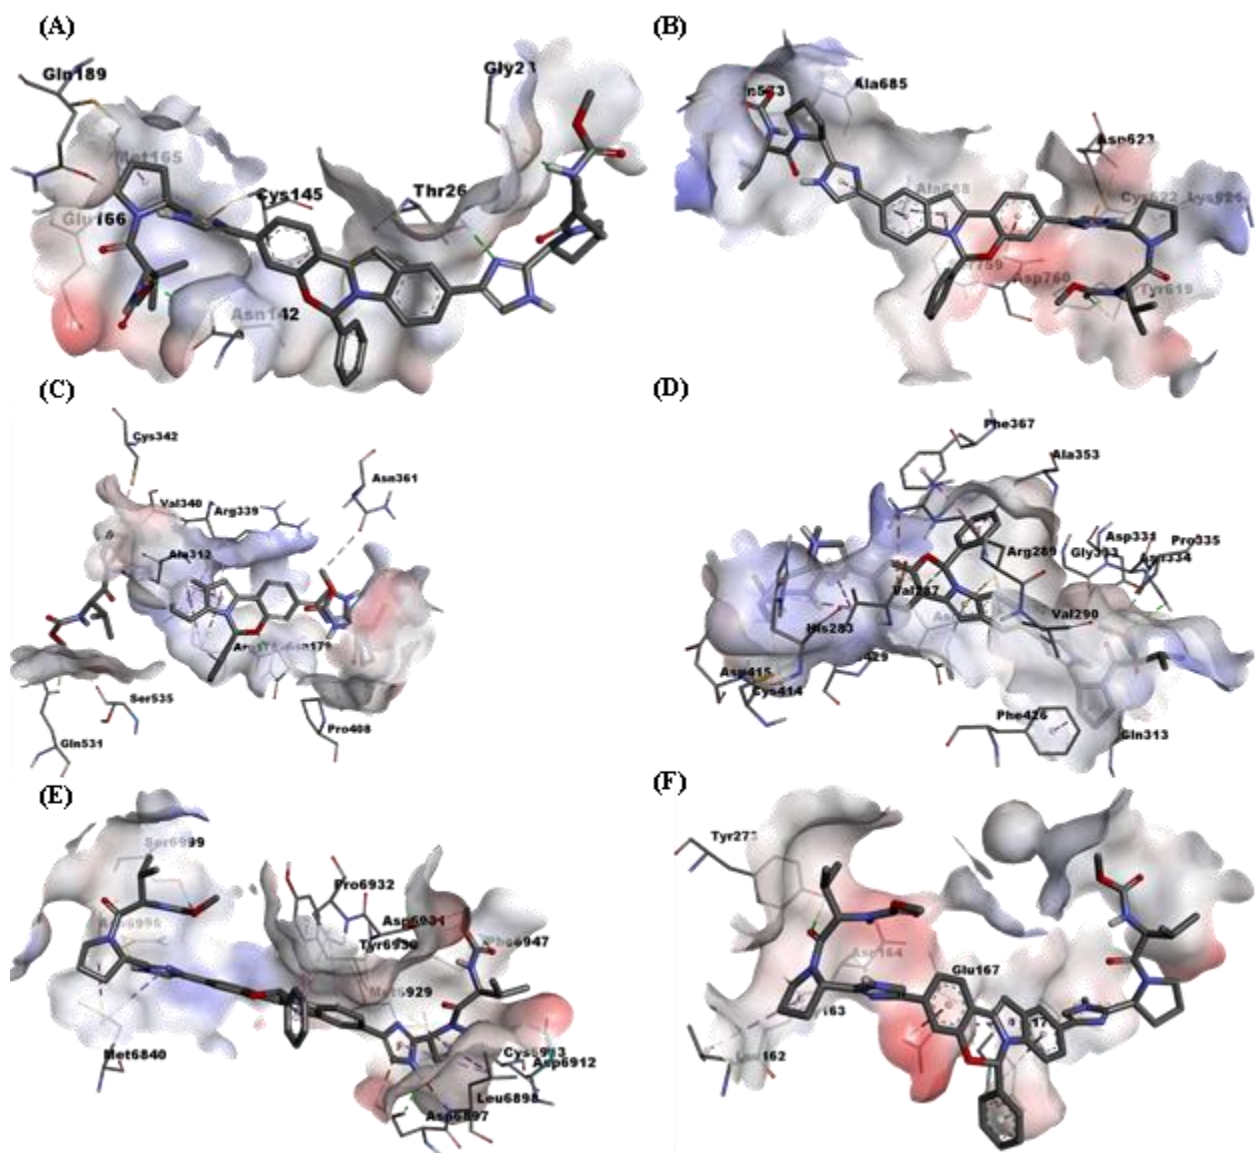

**Fig. S9.** Electrostatic interaction diagram of Elbasvir with SARS-CoV-2 protein targets (A) 3CLpro (B) PLpro (C) NSP12 (D) NSP13 (E) NSP14 and (F) NSP16.

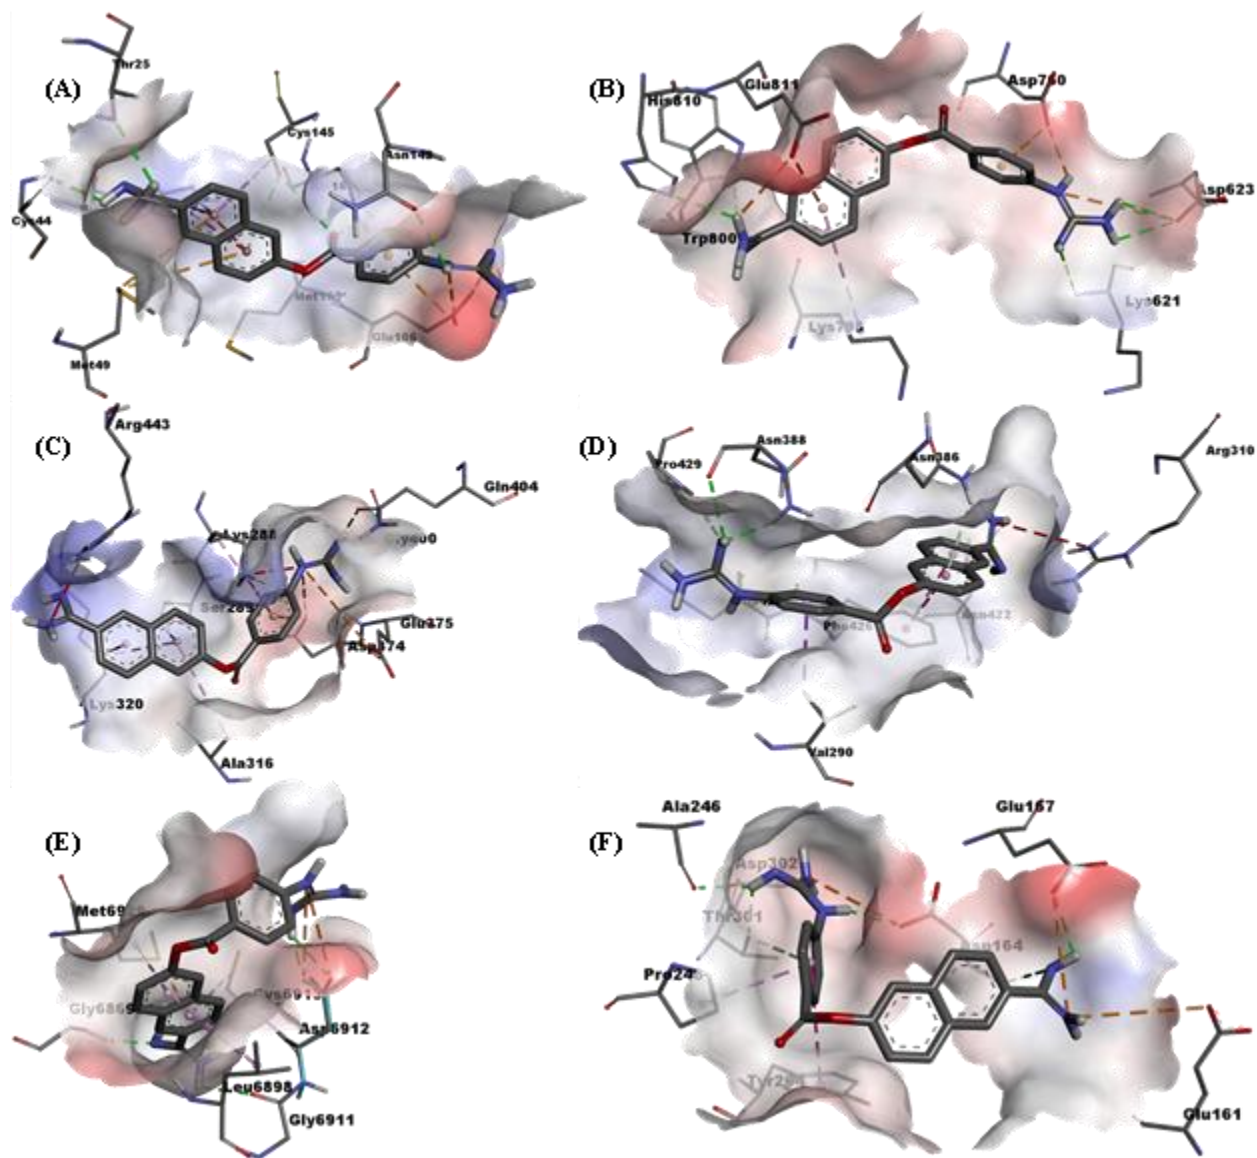

**Fig. S10.** Electrostatic interaction diagram of Nafamostat with SARS-CoV-2 protein targets (A) 3CLpro (B) PLpro (C) NSP12 (D) NSP13 (E) NSP14 and (F) NSP16.

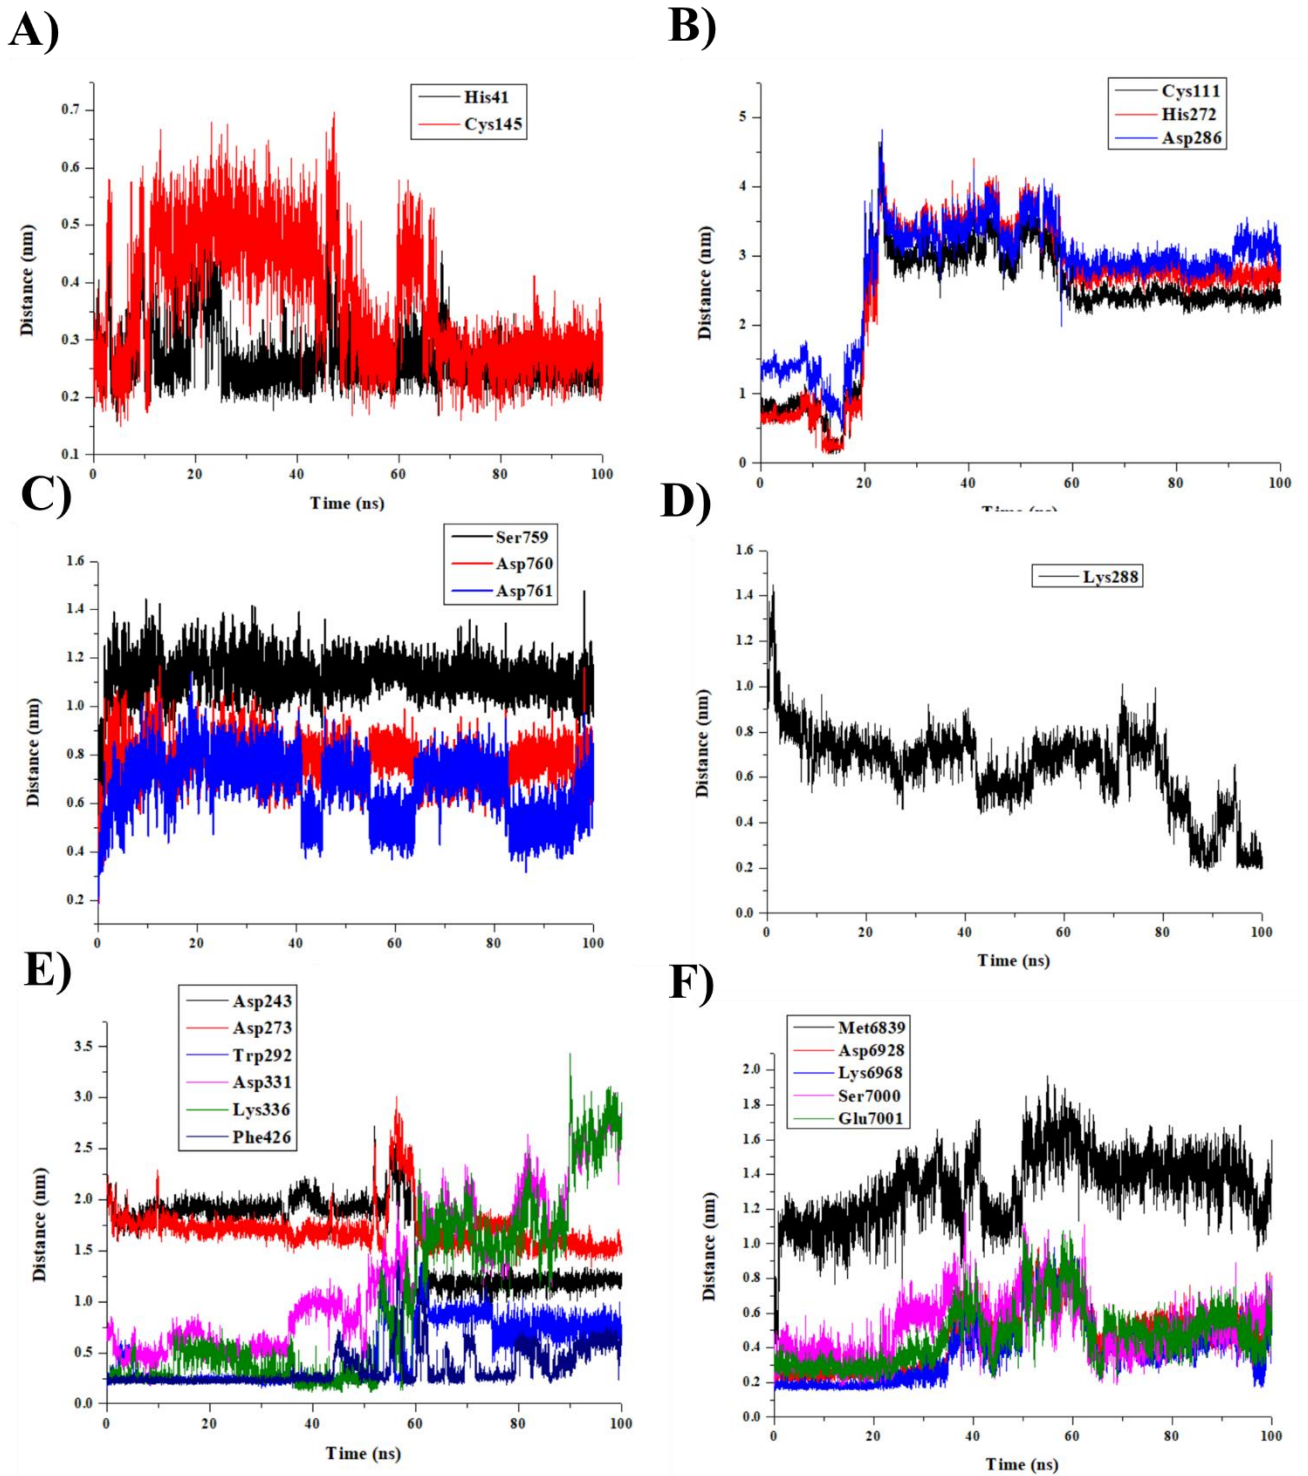

**Fig. S11.** The distance between venetoclax and the important catalytic residues of (A) 3CL<sup>pro</sup>, (B) PI<sup>pro</sup>, (C) NSP12, (D) NSP13, (E) NSP14 and (F) NSP16 proteins.

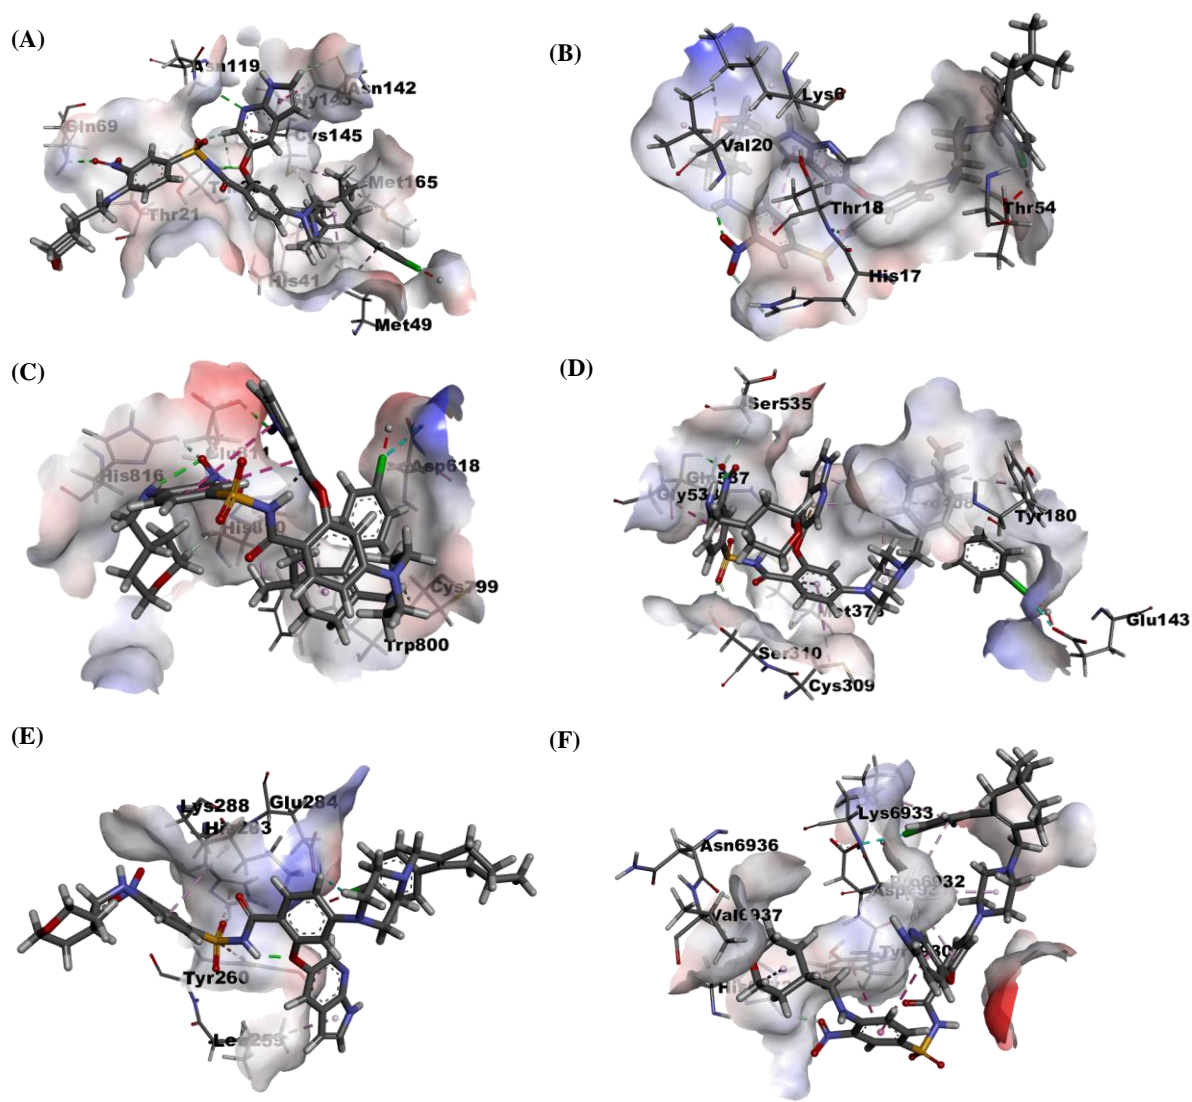

**Fig. S12.** Electrostatic interaction diagram of Venetoclax with SARS-CoV-2 protein targets (A) 3CLpro (B) PLpro (C) NSP12 (D) NSP13 (E) NSP14 and (F) NSP16. The energetically favored conformers were identified through PCA-FEL analysis and the interaction diagram has been depicted in the figure.
